# Supplementary material
Source: PubMed Central journal article supplement (PMC7643810)

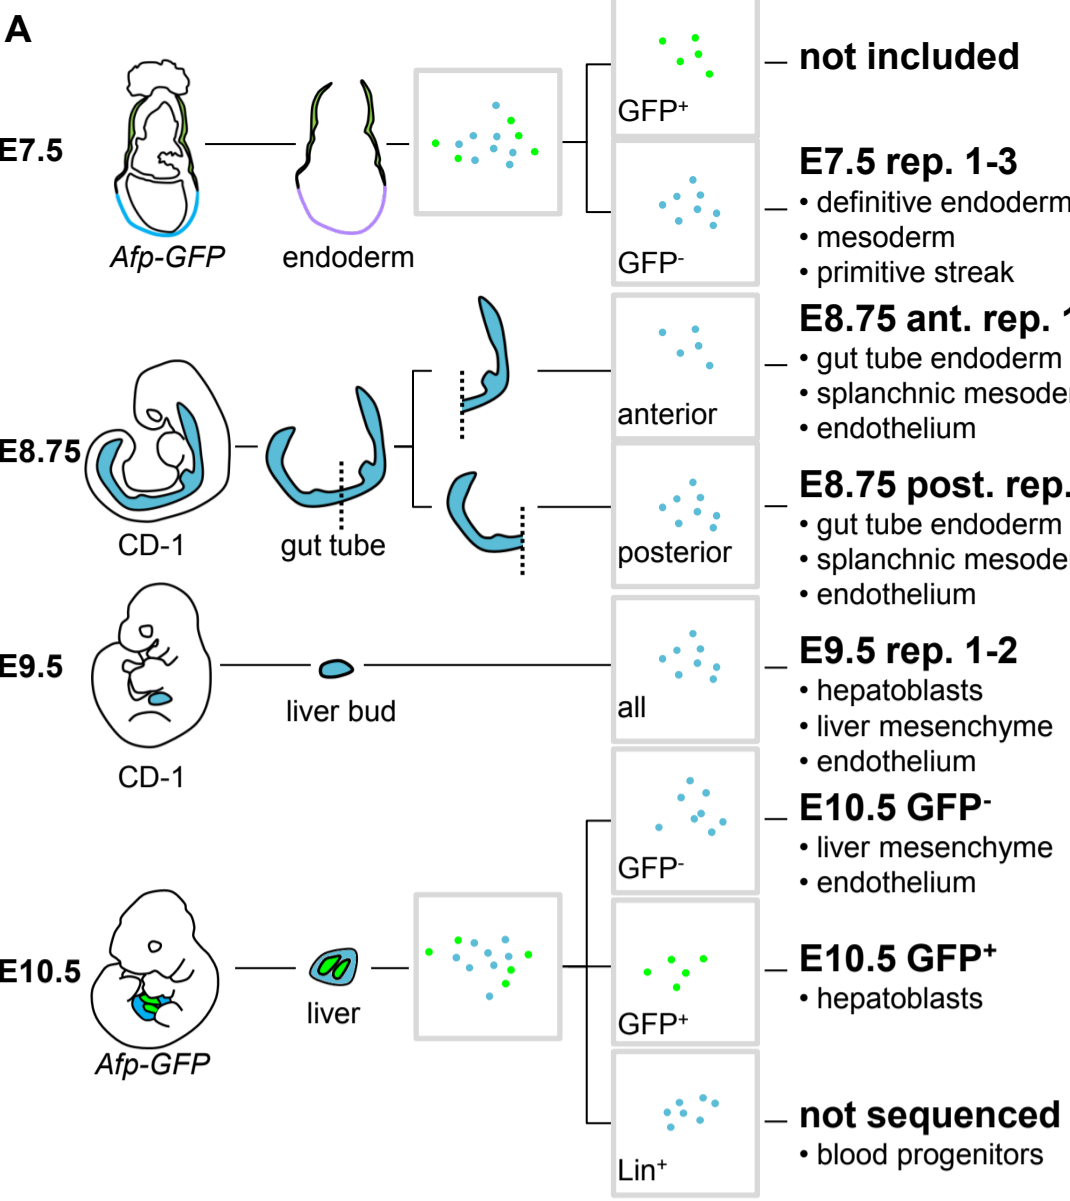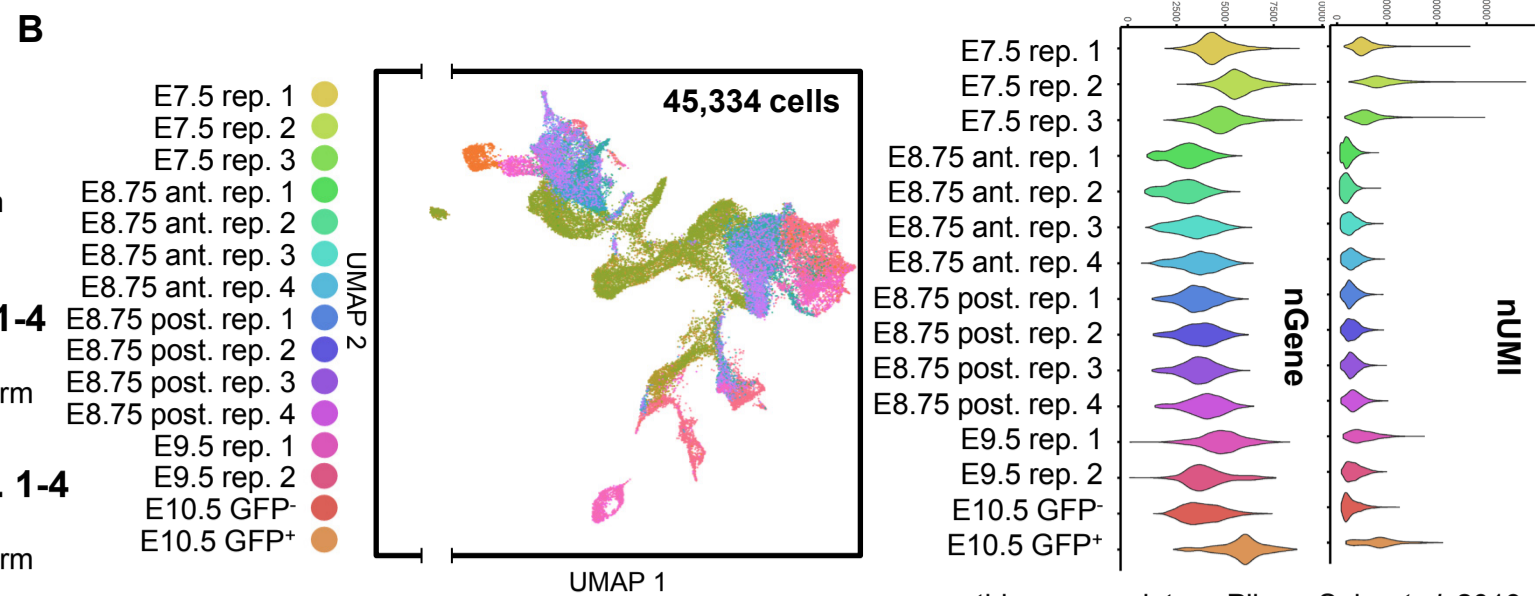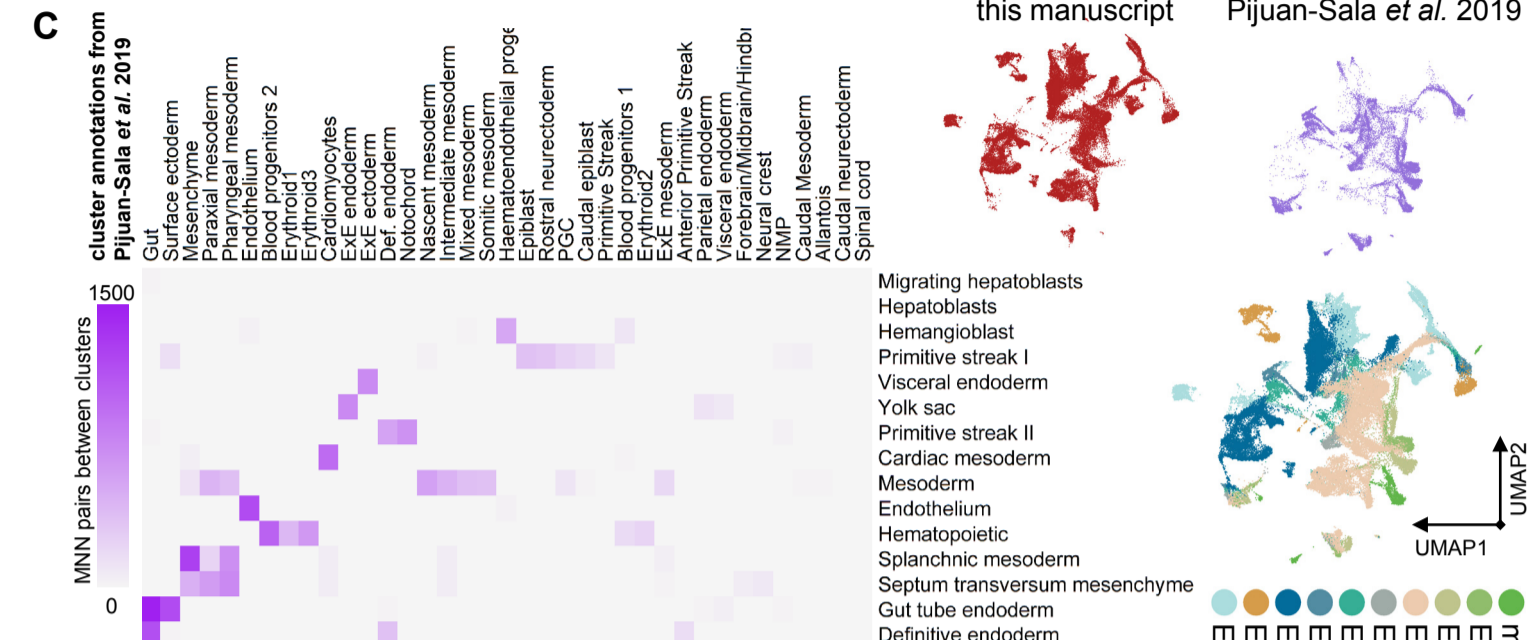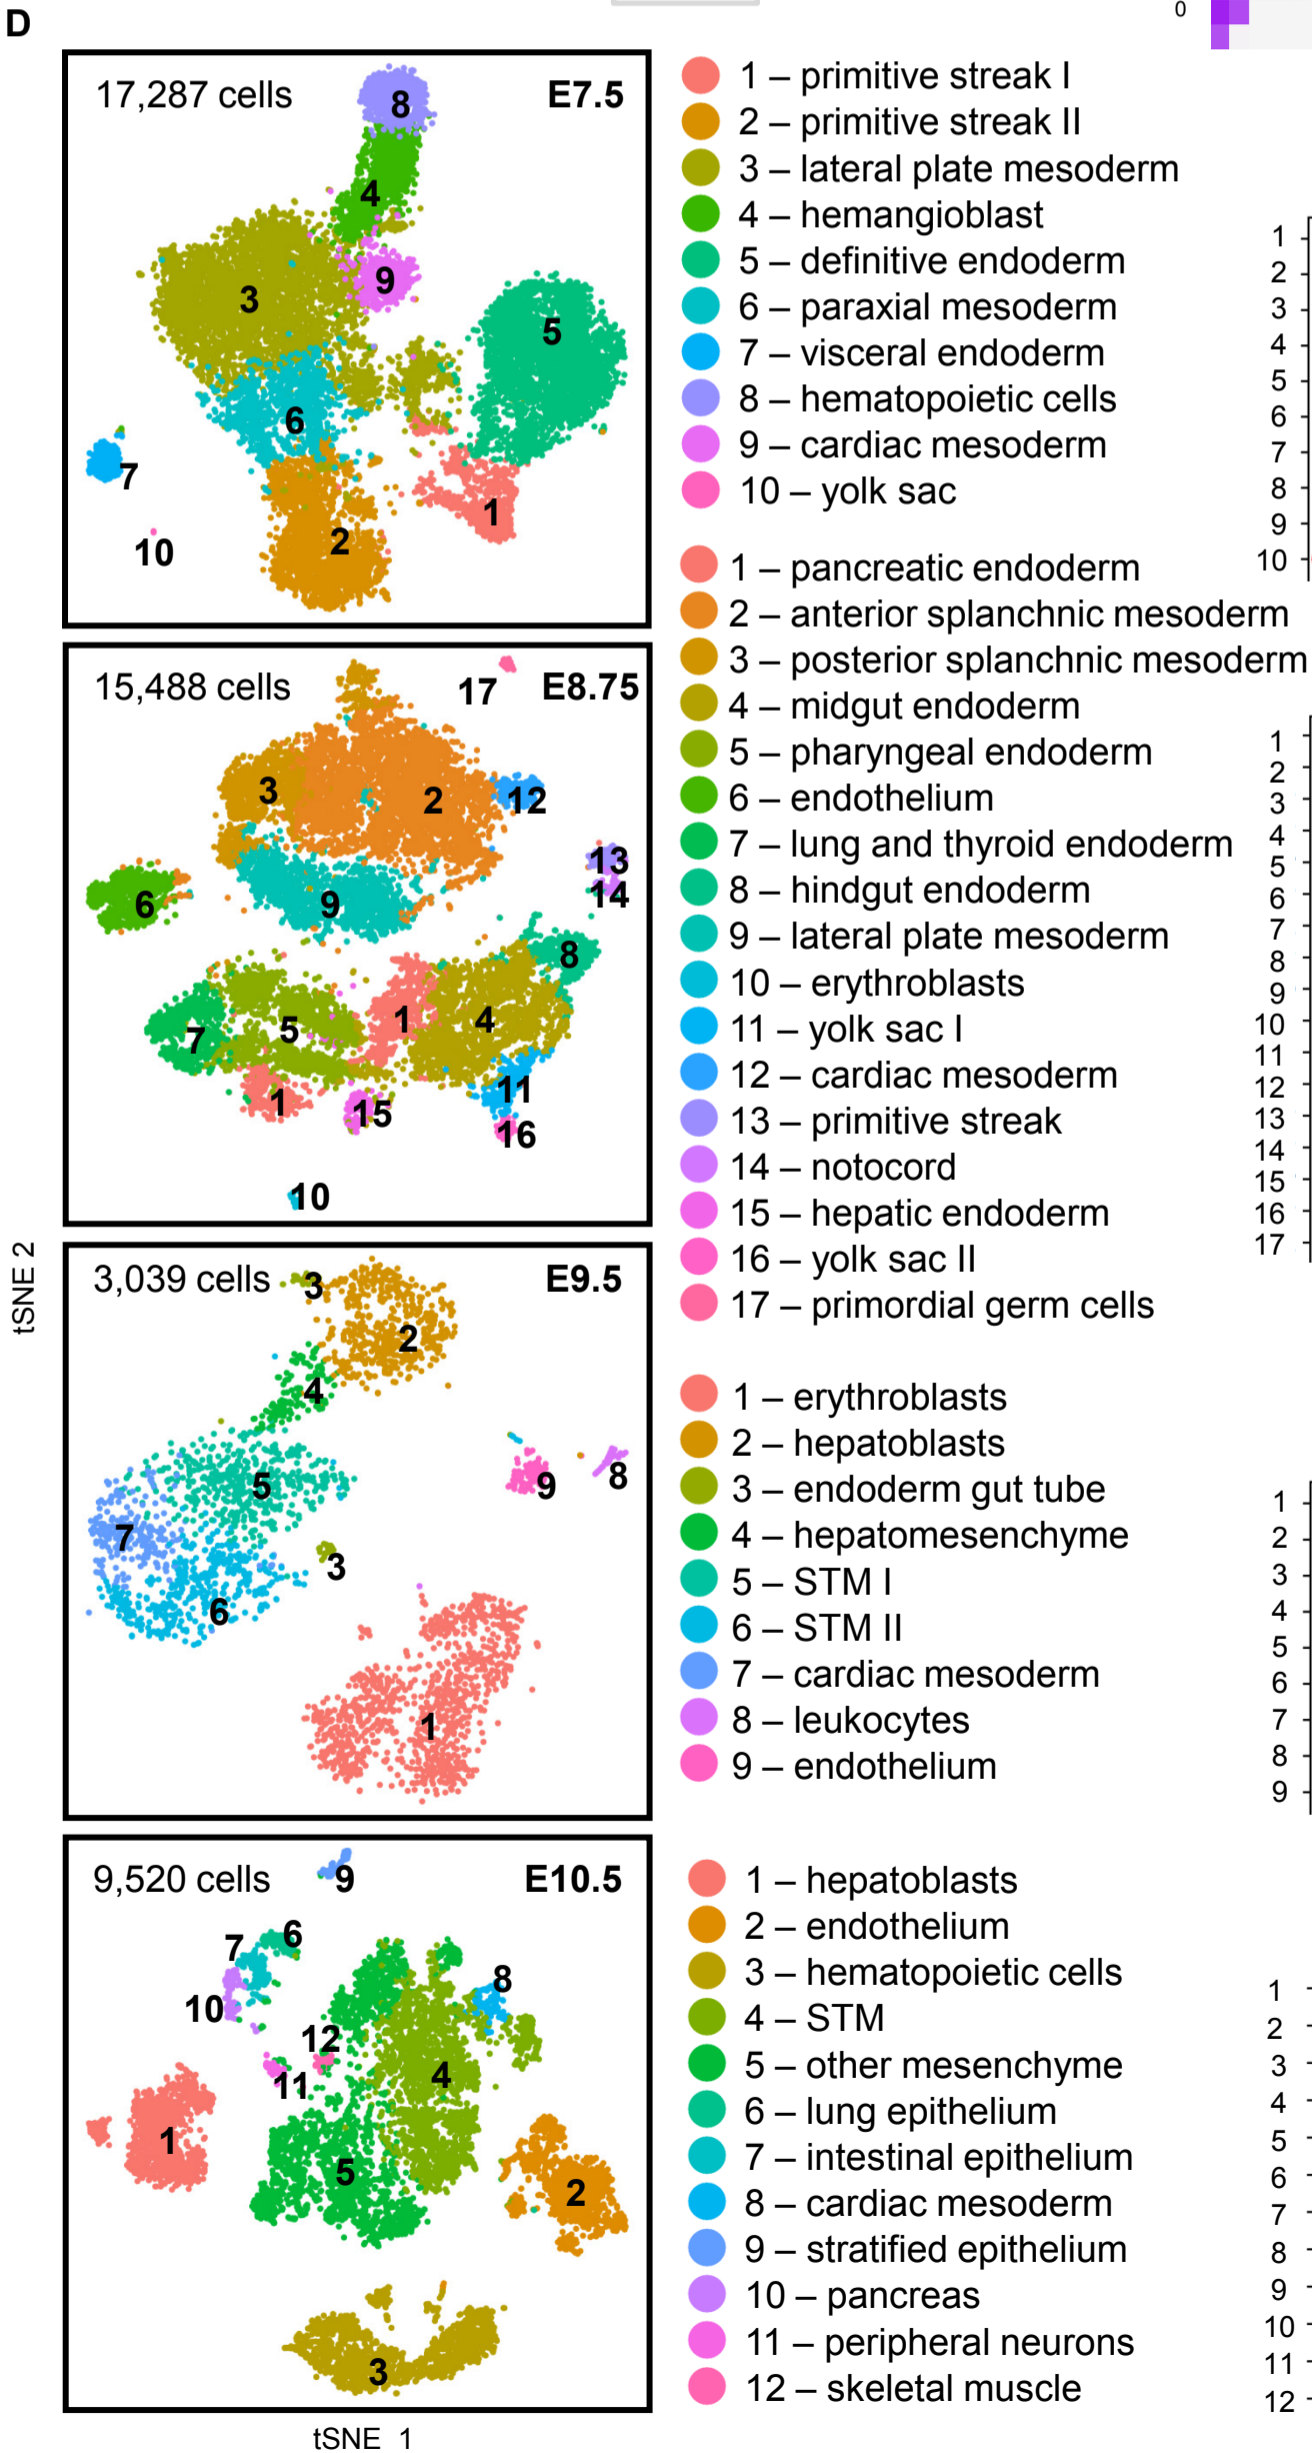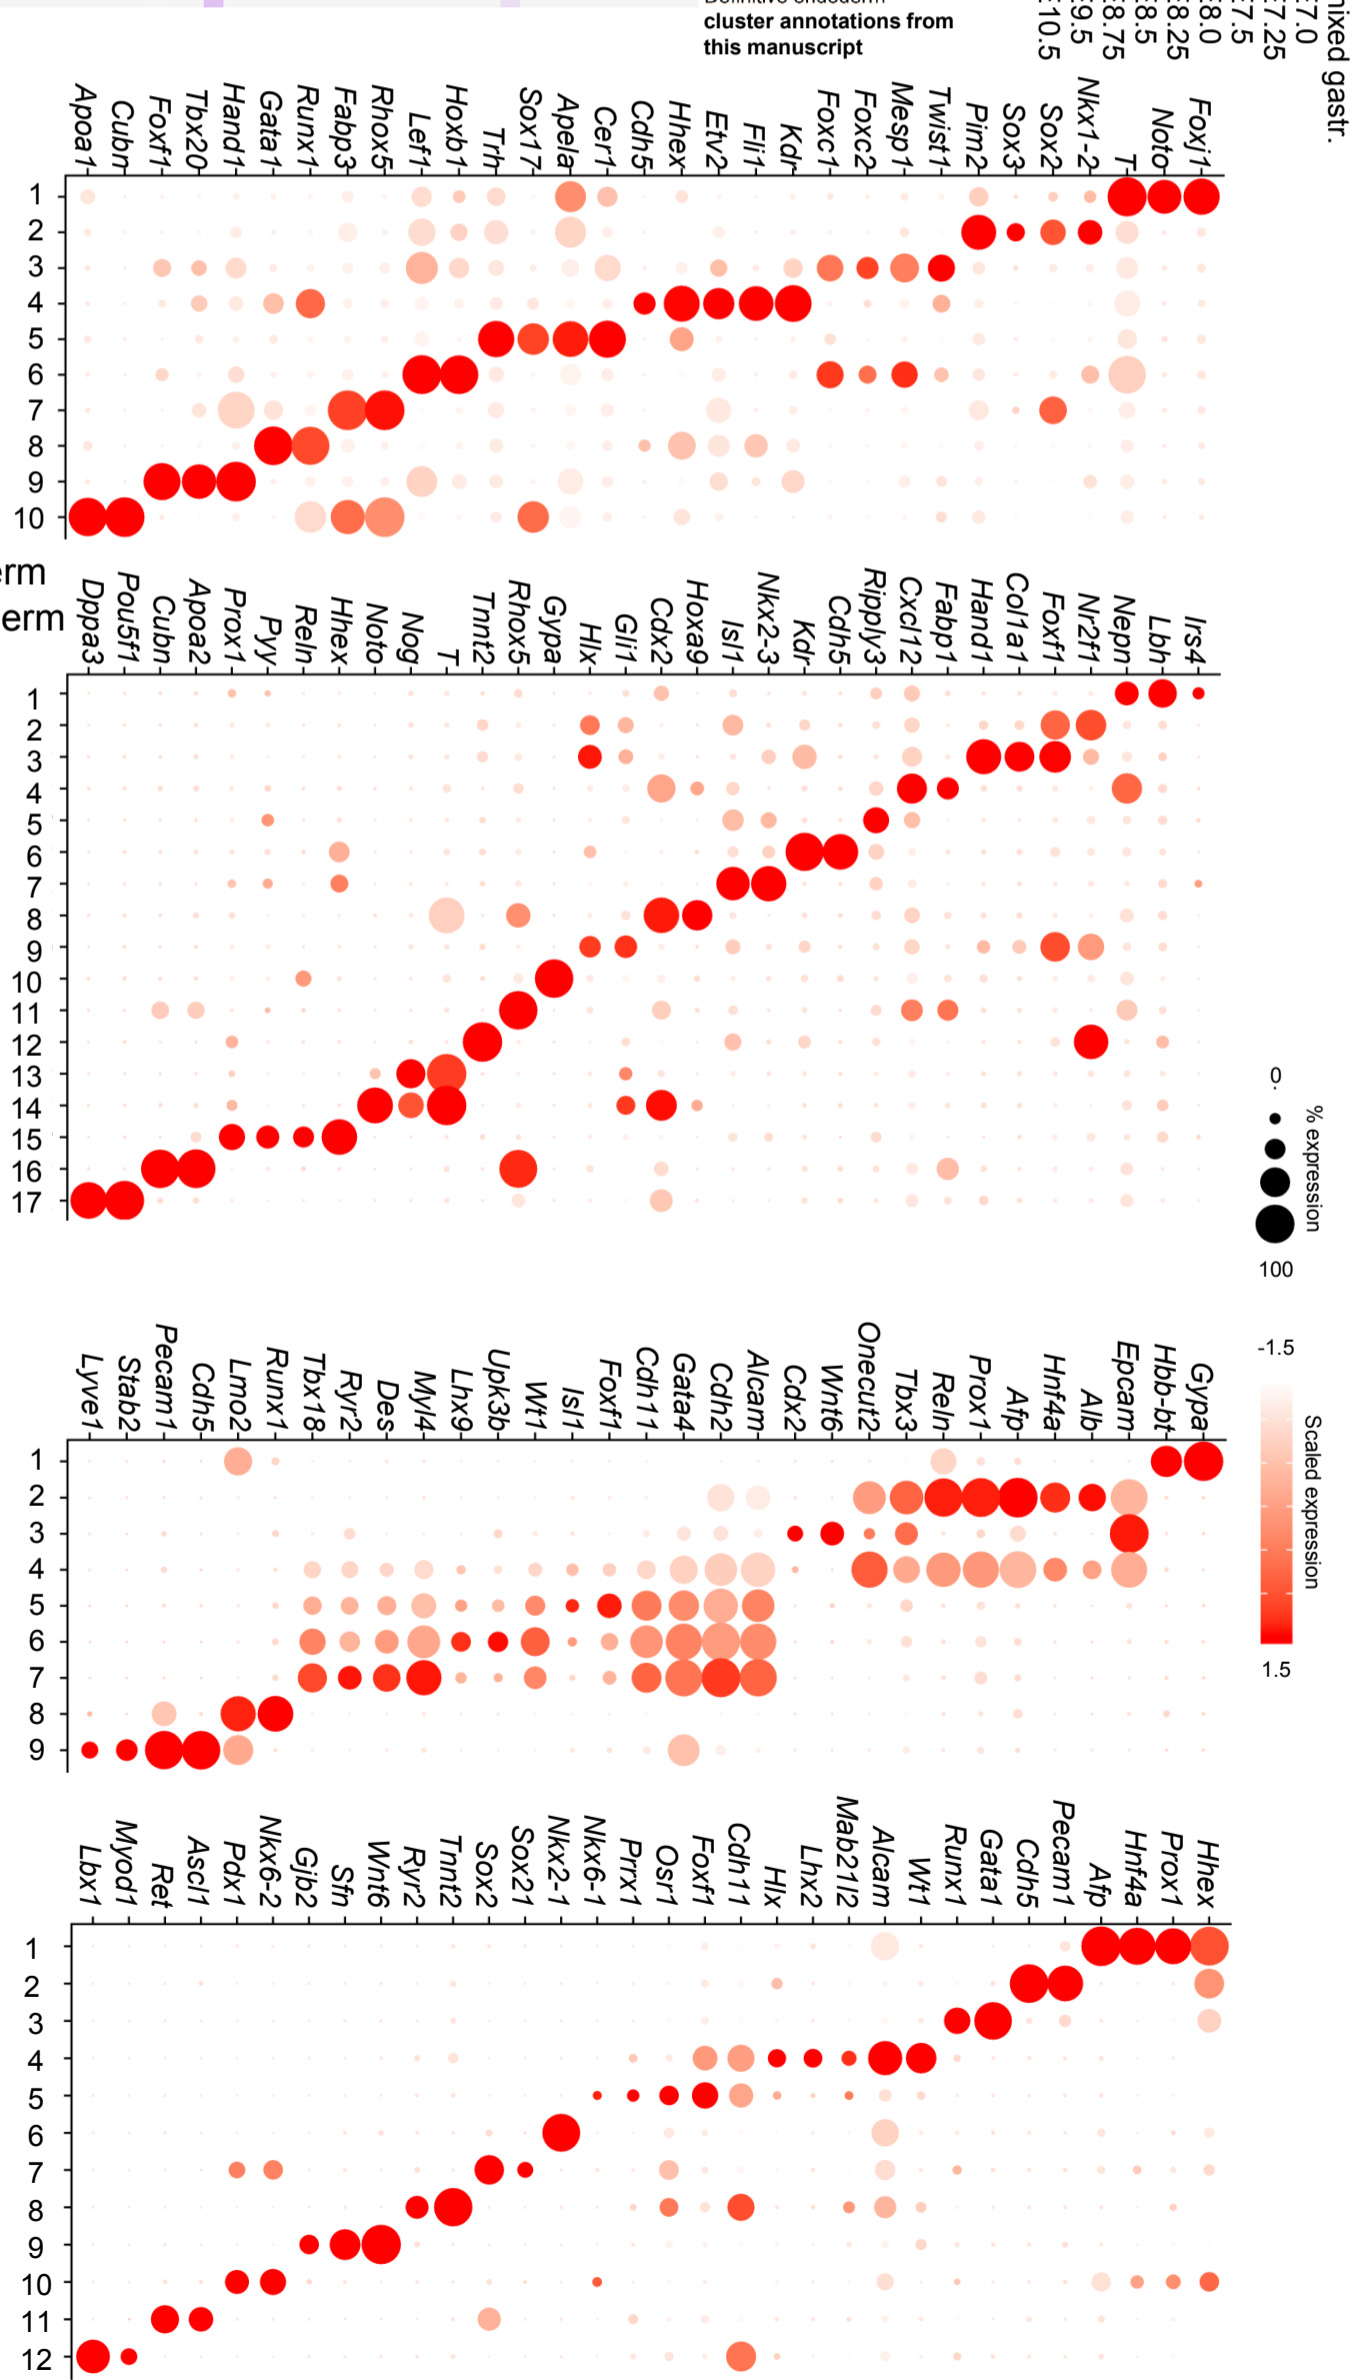

Supplement: NIHMS1637946-supplement-1.pdf [file NIHMS1637946-supplement-1.pdf]

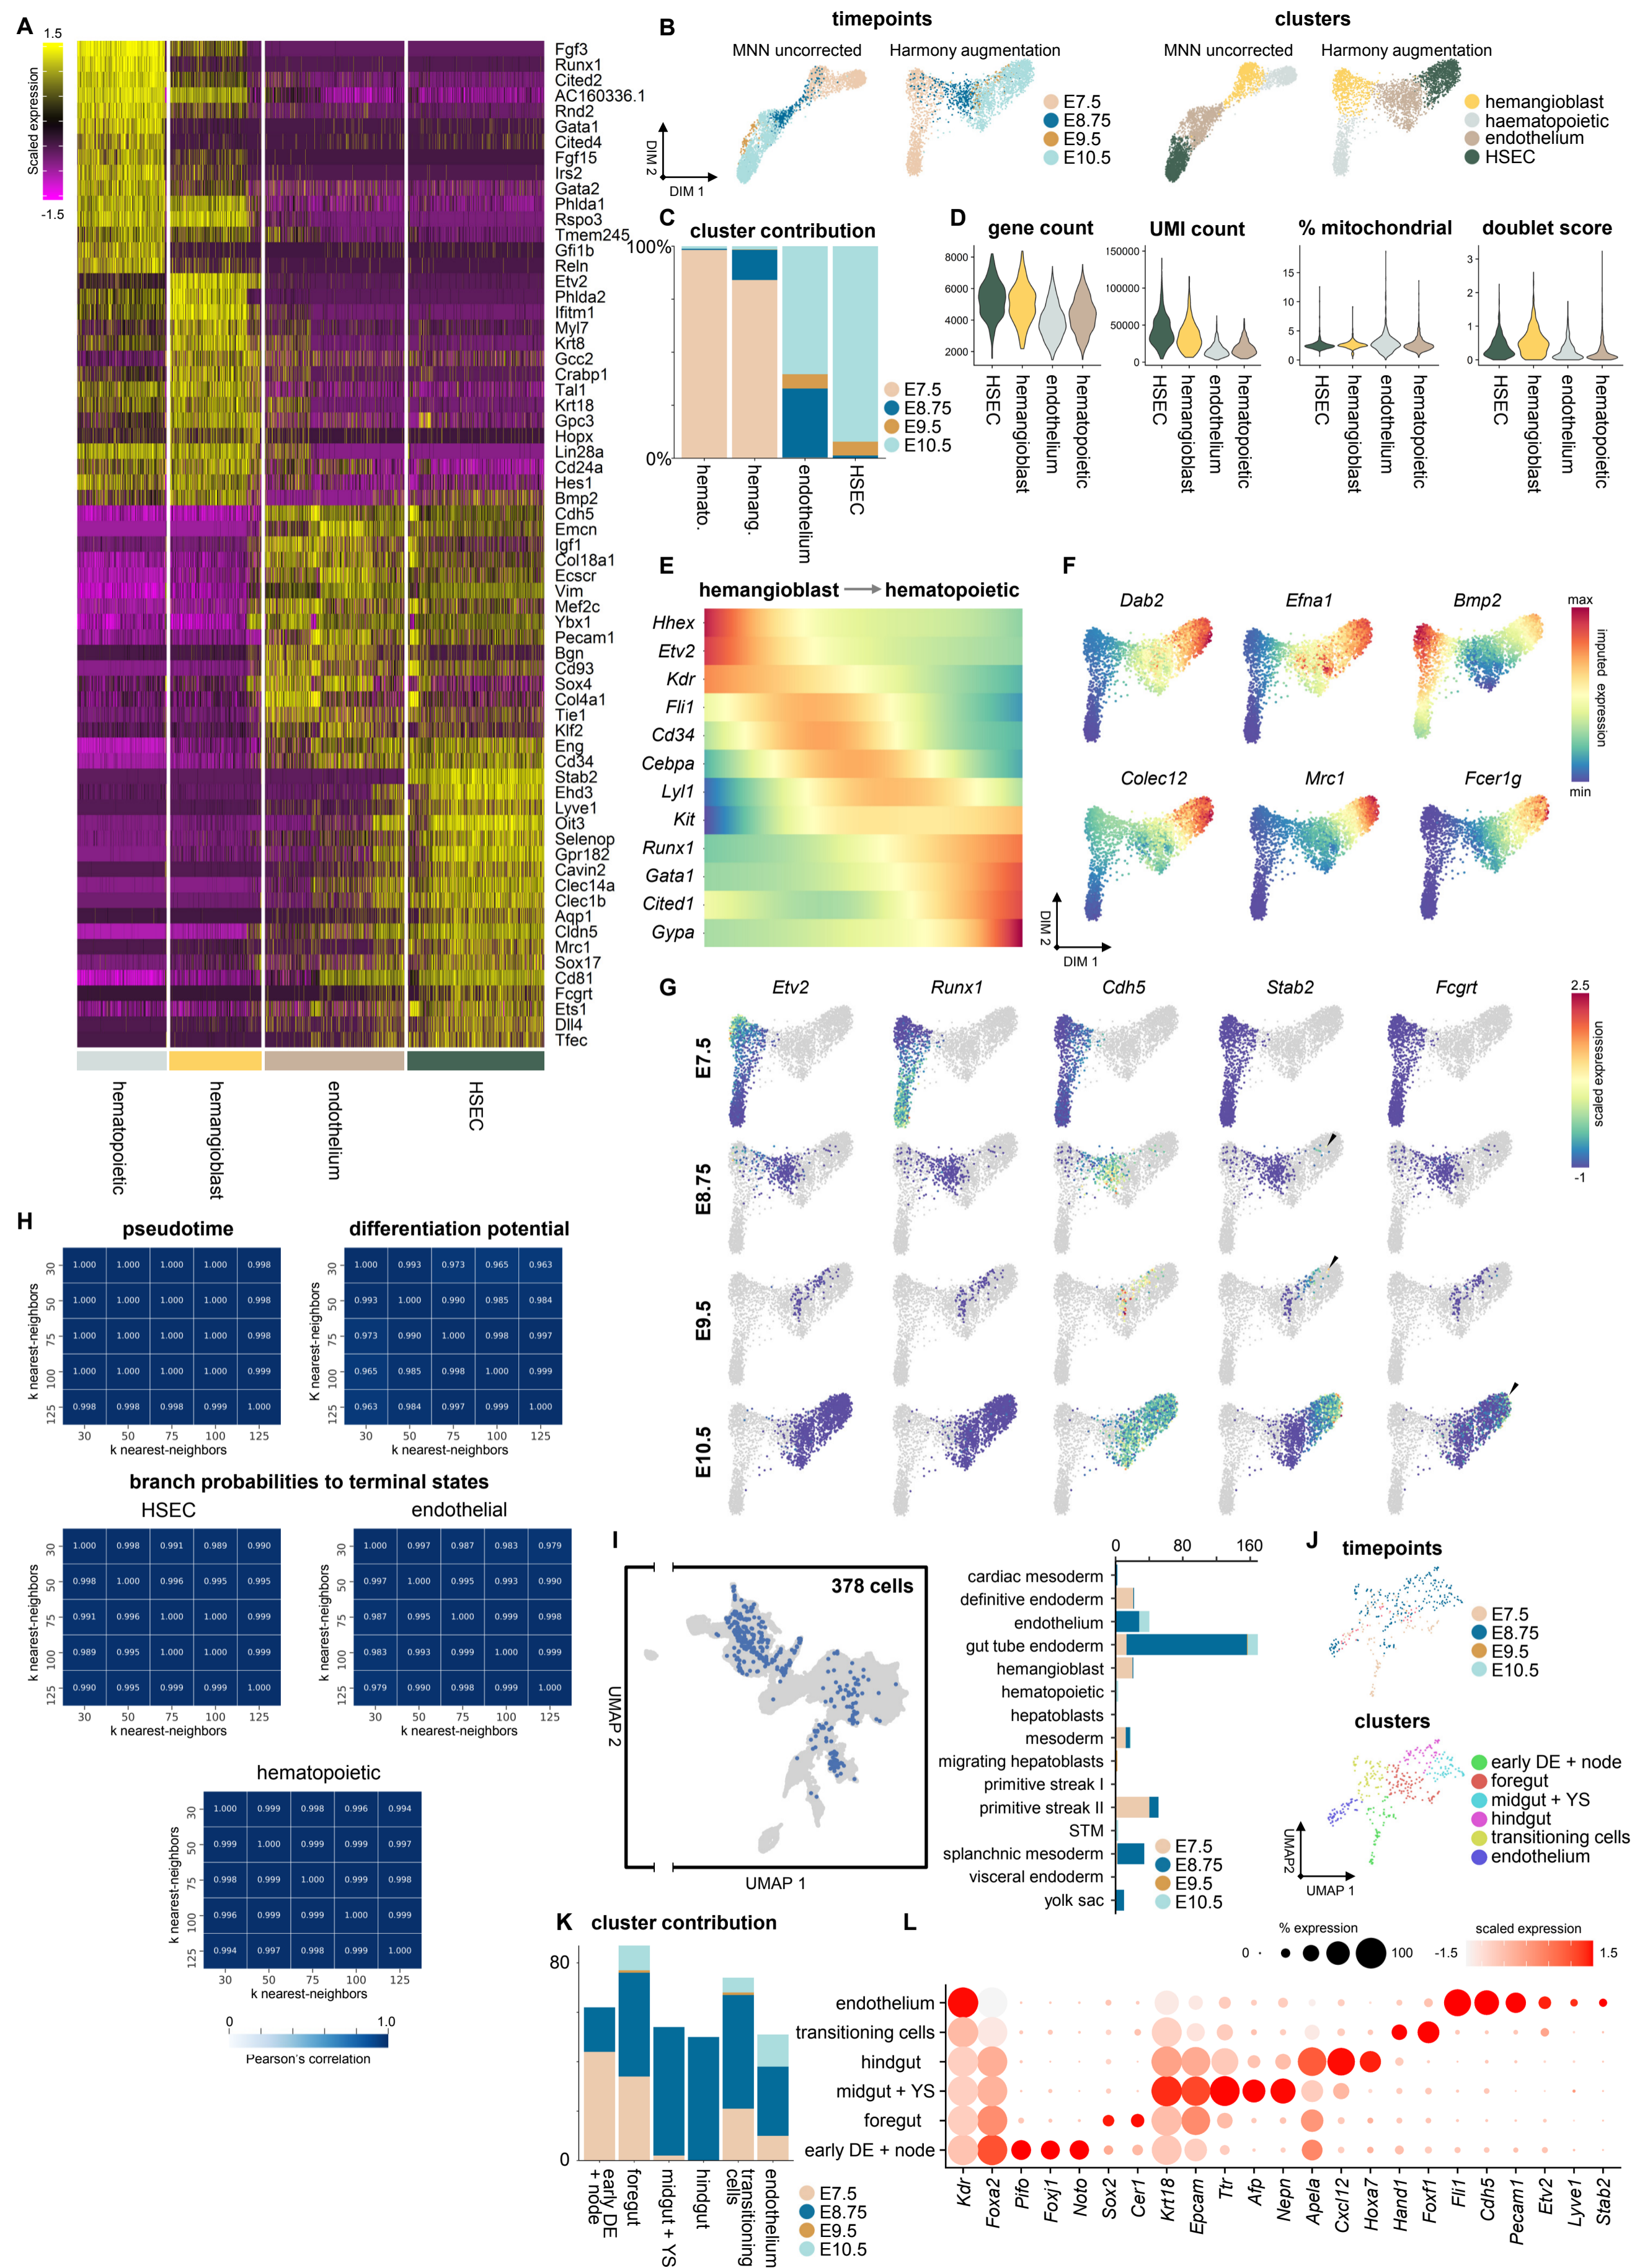

Supplement: NIHMS1637946-supplement-2.pdf [file NIHMS1637946-supplement-2.pdf]

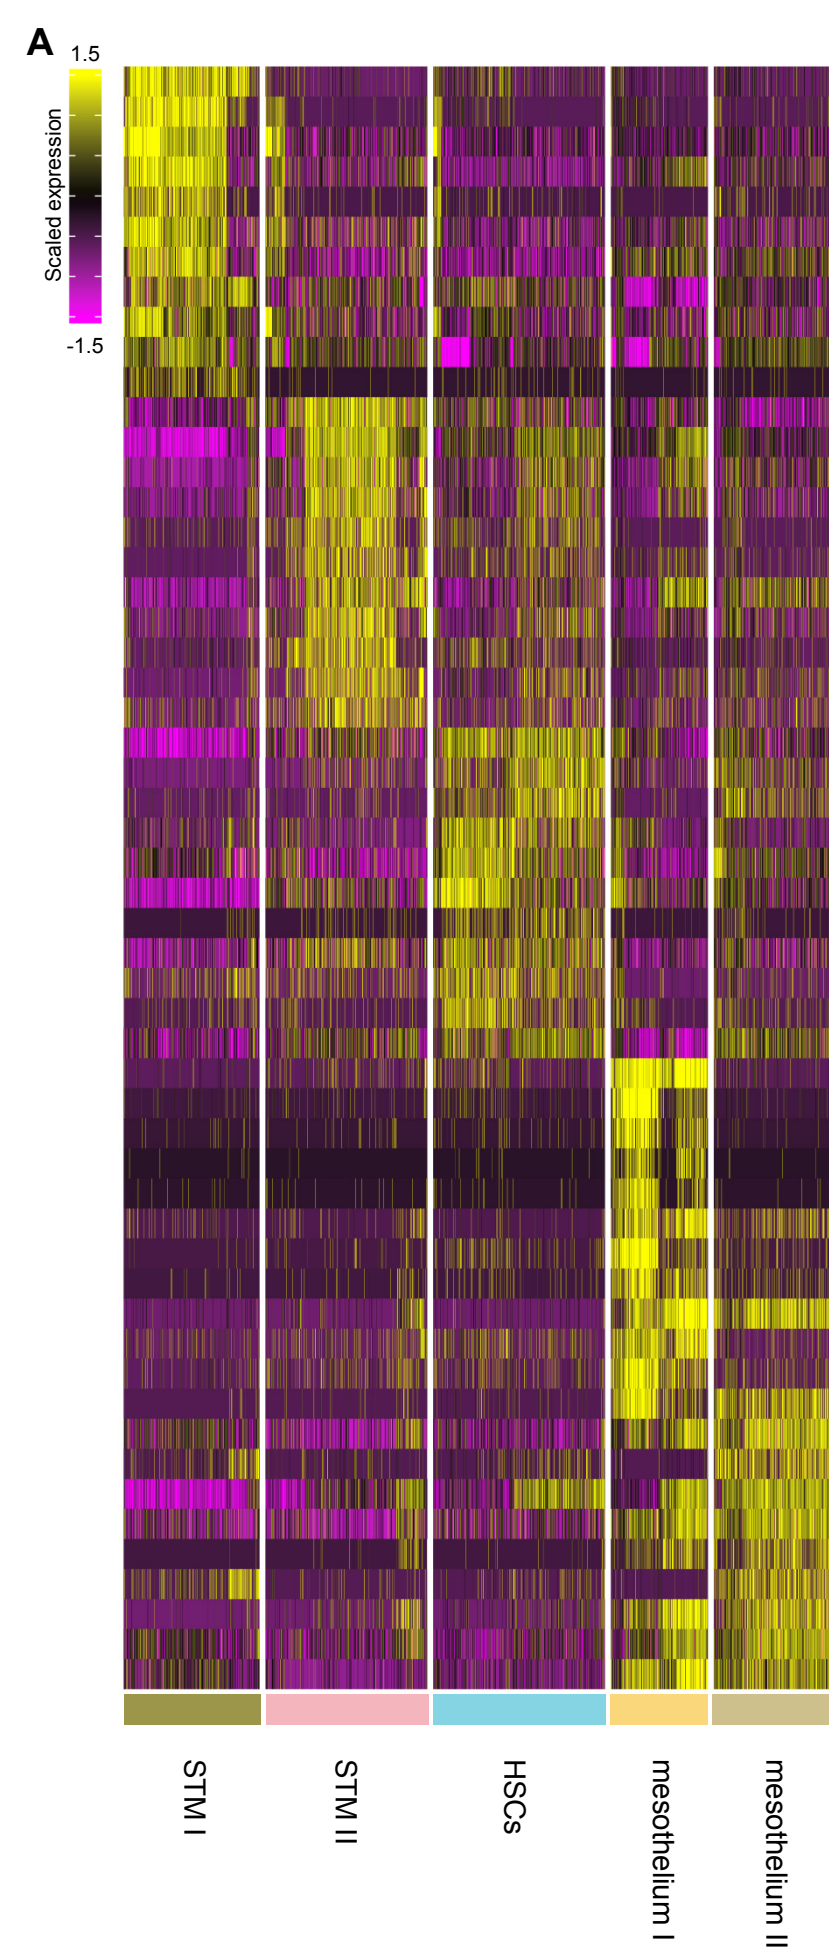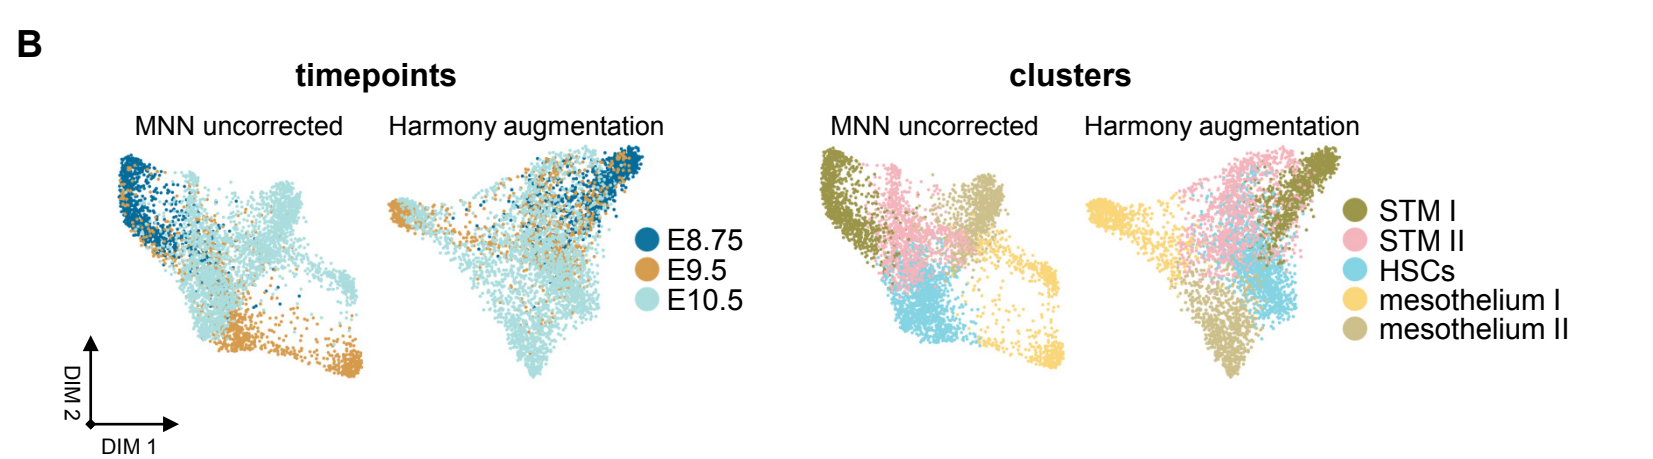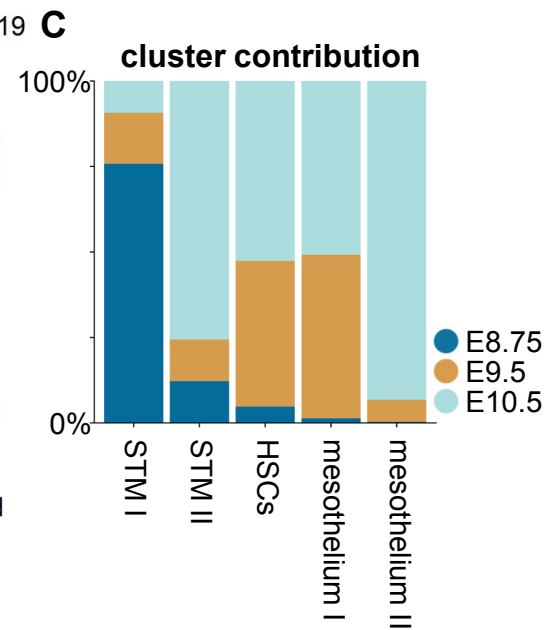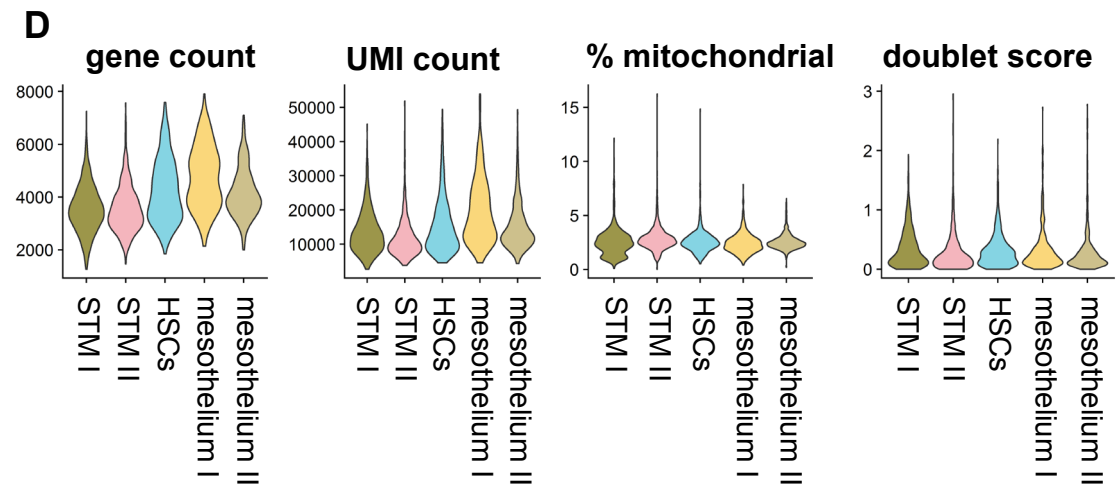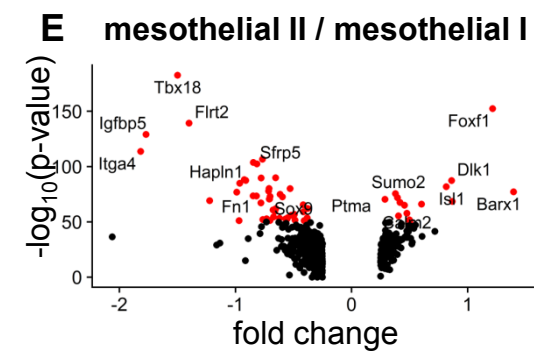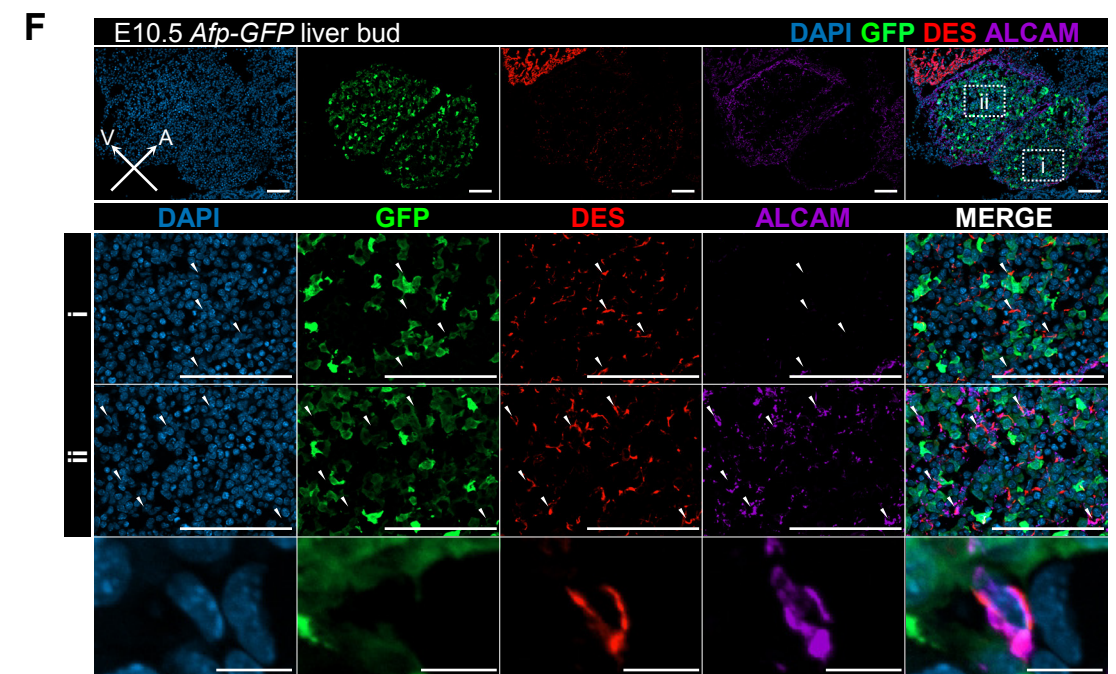

Supplement: NIHMS1637946-supplement-3.pdf [file NIHMS1637946-supplement-3.pdf]

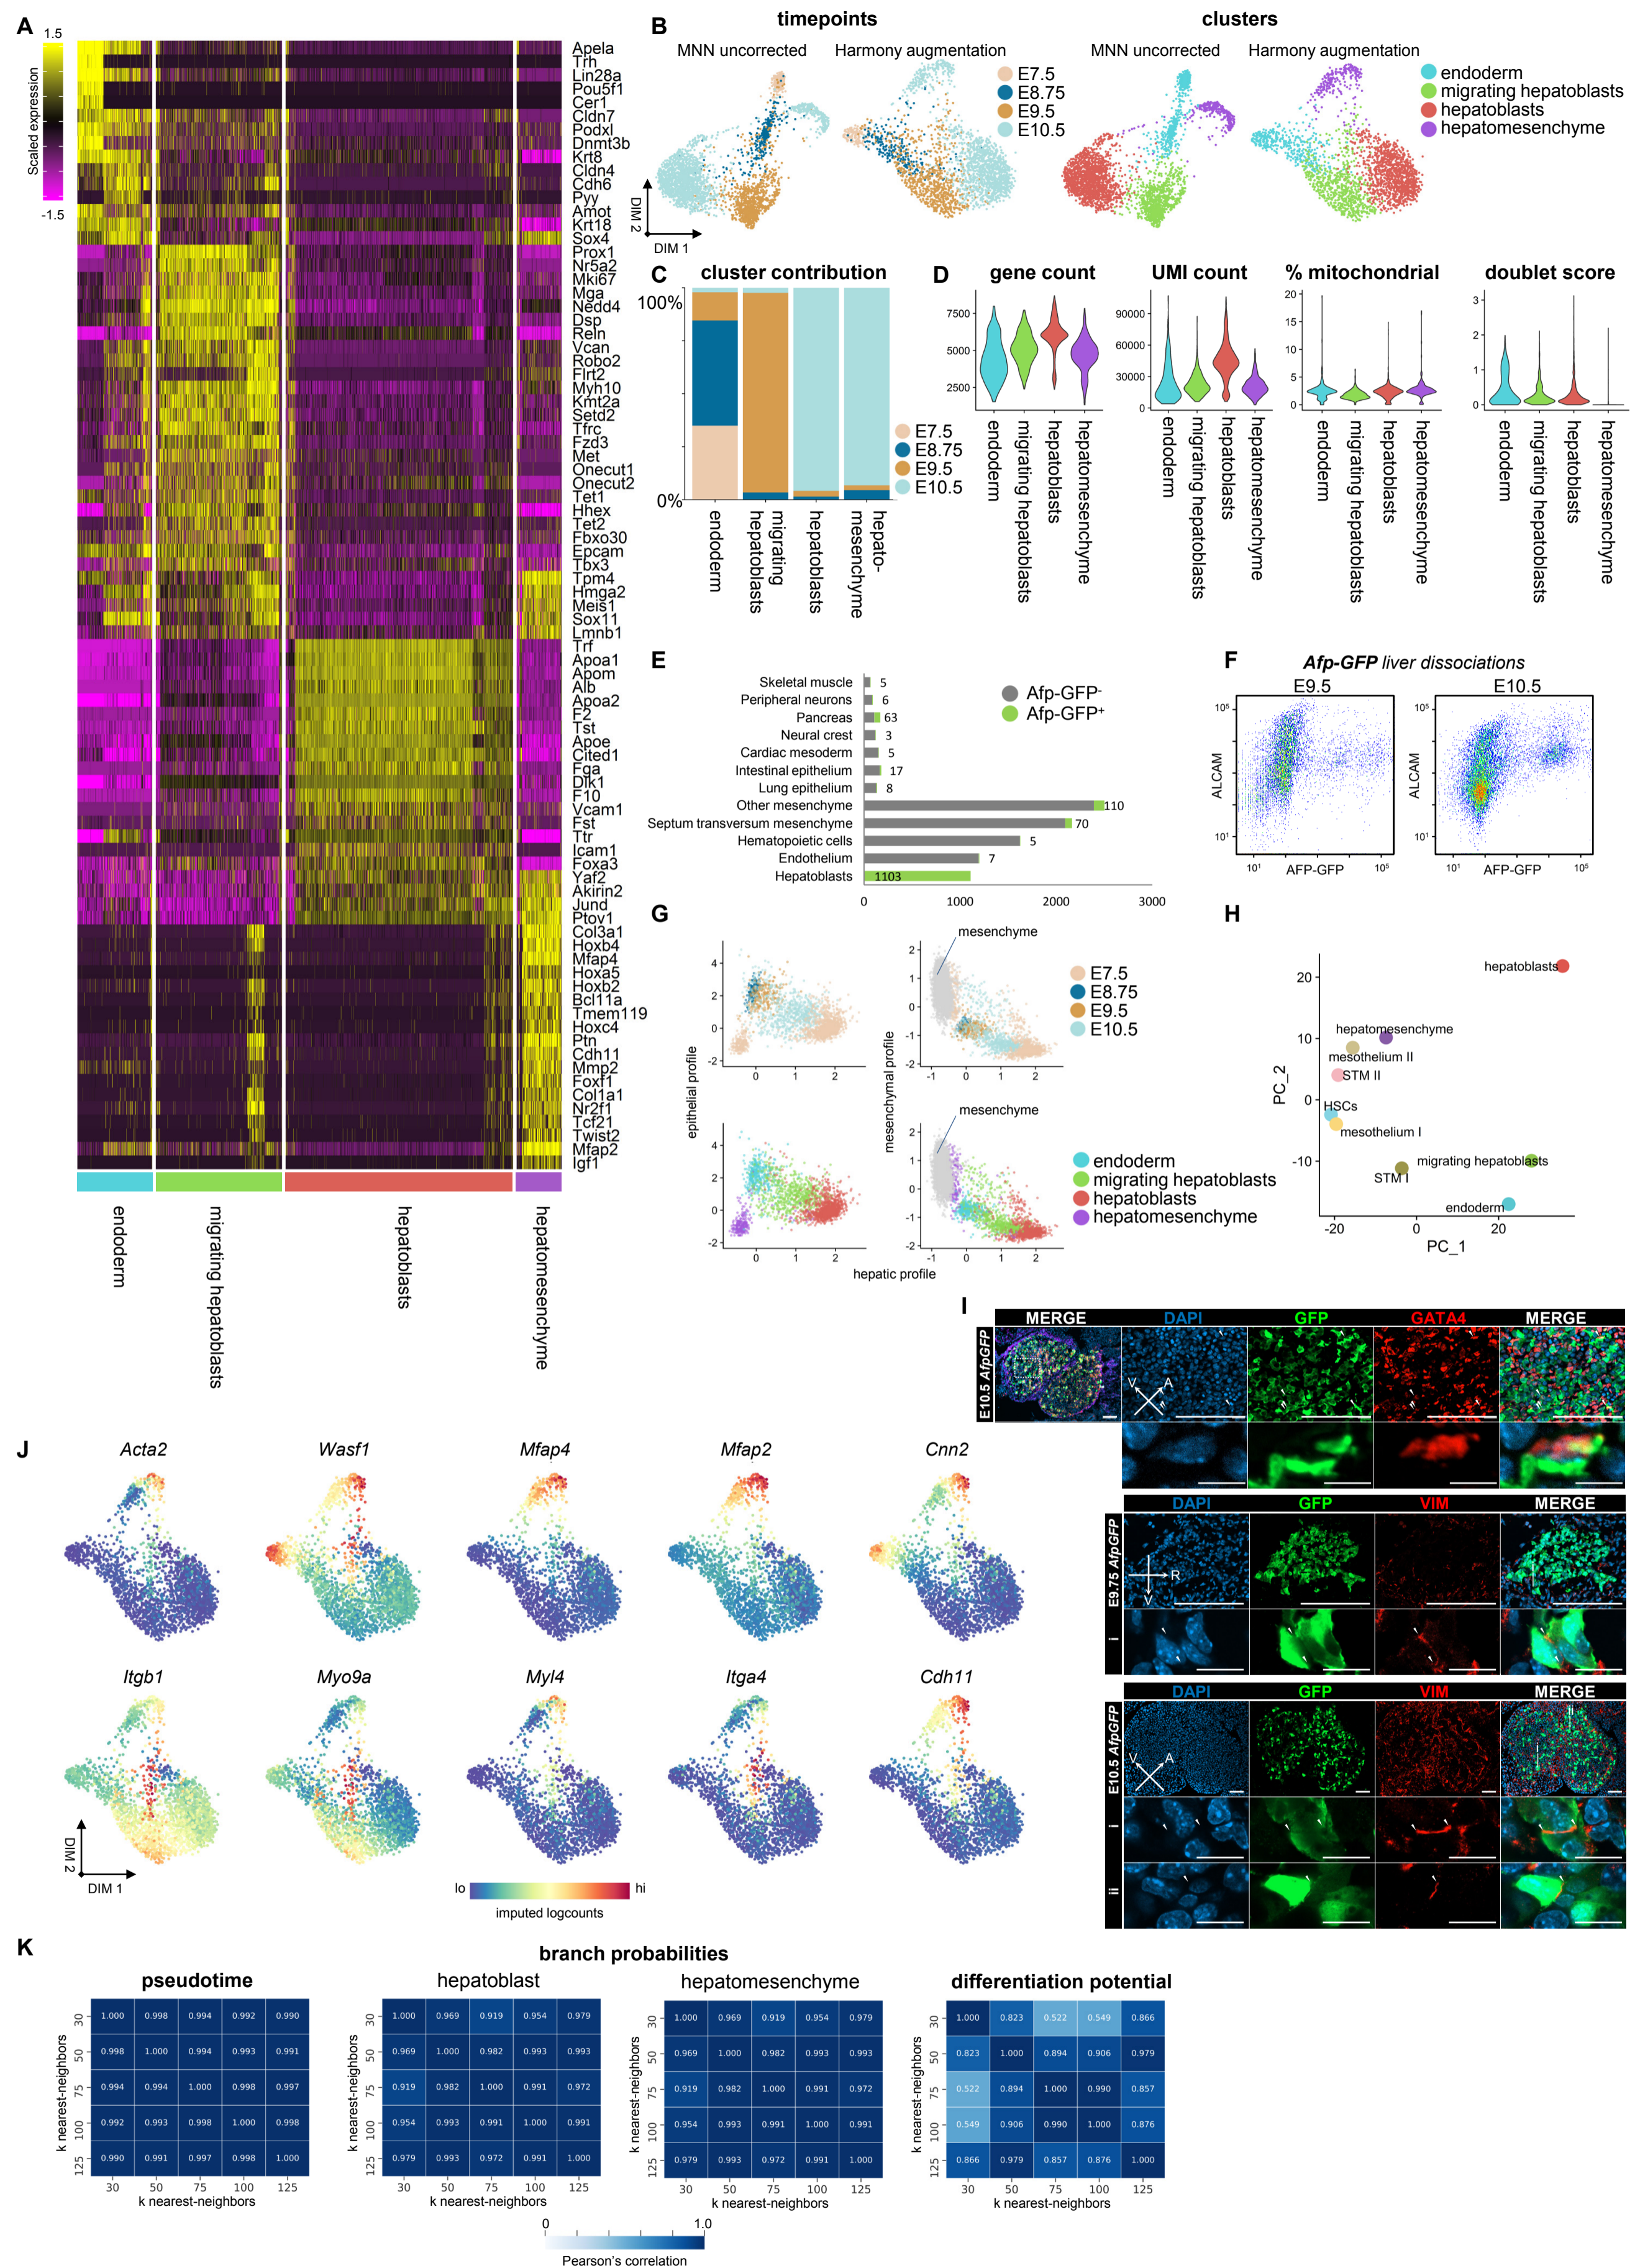

Supplement: NIHMS1637946-supplement-4.pdf [file NIHMS1637946-supplement-4.pdf]
